# Supplementary material
Source: PubMed Central journal article supplement (PMC149888)
Supplement: pnas_0434003100_4.pdf [file pnas_0434003100_4.pdf]

Supporting information for Rothwell *et al.* (2003) *Proc. Natl. Acad. Sci. USA*,  
10.1073/pnas.0434003100.

**Fig. 6.** Results for time-resolved anisotropy,  $r$ , in the green and in the red channels from the species (P-P) and (P-E), as depicted in Fig. 4.
