# Supplementary material
Source: PubMed Central journal article supplement (PMC149888)

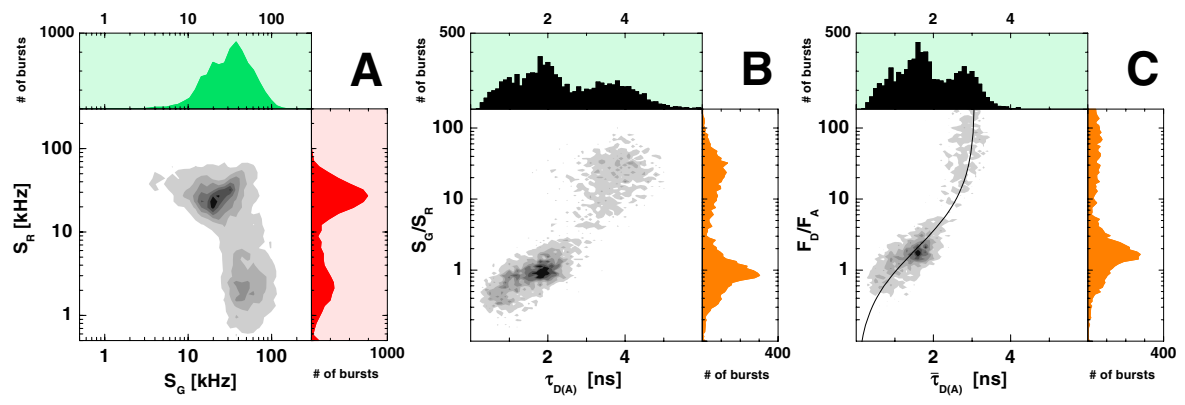

Supplement: pnas_0434003100_3.pdf [file pnas_0434003100_3.pdf]

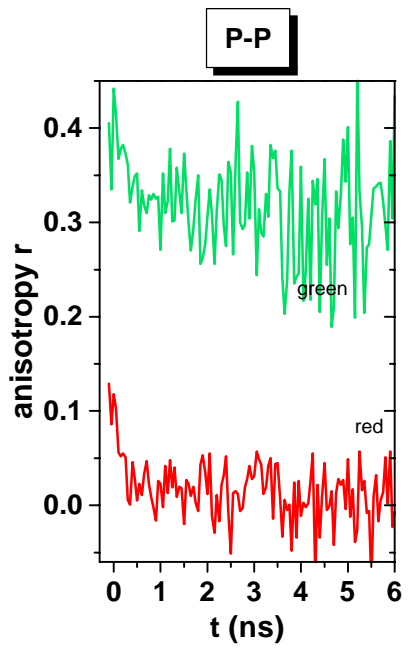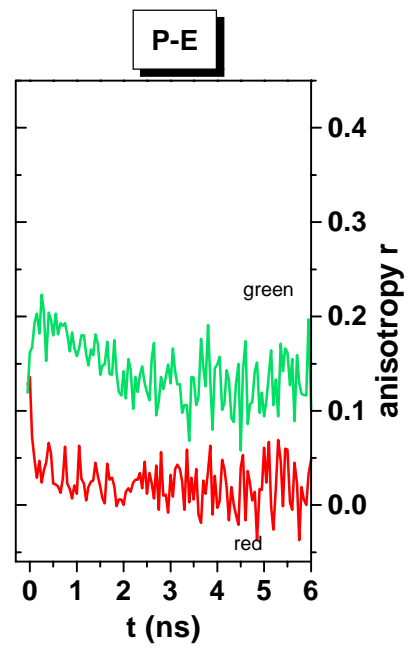

Supplement: pnas_0434003100_5.pdf [file pnas_0434003100_5.pdf]
